# Supplementary material for: Degradable polycaprolactone nanoparticles stabilized via supramolecular host–guest interactions with pH-responsive polymer-pillar[5]arene conjugates
Source: Royal Society of Chemistry journal article supplement (doi:10.1039/c9py01928f), 2020-01-01
Supplement: c9py01928f2.pdf [file c9py01928f2.pdf]

## Supporting Information

### Degradable polycaprolactone nanoparticles stabilized via supramolecular host-guest interactions with pH-responsive polymer-pillar[5]arene conjugates

*Peng Wei,<sup>a,b</sup> Fabian H. Sobotta,<sup>a,b</sup> Carolin Kellner,<sup>a,b</sup> Damiano Bandelli,<sup>a,b</sup> Stephanie Höppener,<sup>a,b</sup>  
Stephanie Schubert,<sup>b,c</sup> Johannes C. Brendel,<sup>a,b</sup> Ulrich S. Schubert \*,<sup>a,b</sup>*

<sup>a</sup> Laboratory of Organic and Macromolecular Chemistry (IOMC), Friedrich Schiller University Jena,  
Humboldtstraße 10, 07743 Jena, Germany

<sup>b</sup> Jena Center for Soft Matter (JCSM), Friedrich Schiller University Jena, Philosophenweg 7, 07743  
Jena, Germany

<sup>c</sup> Institute of Pharmacy and Biopharmacy, Department of Pharmaceutical Technology, Friedrich  
Schiller University Jena, Lessingstrasse 8, 07743 Jena, Germany

\*Correspondence to: U. S. Schubert (E-mail: [ulrich.schubert@uni-jena.de](mailto:ulrich.schubert@uni-jena.de))

1

2 **Scheme S1** Synthetic route of pillar[5]arene modified CTA.

3

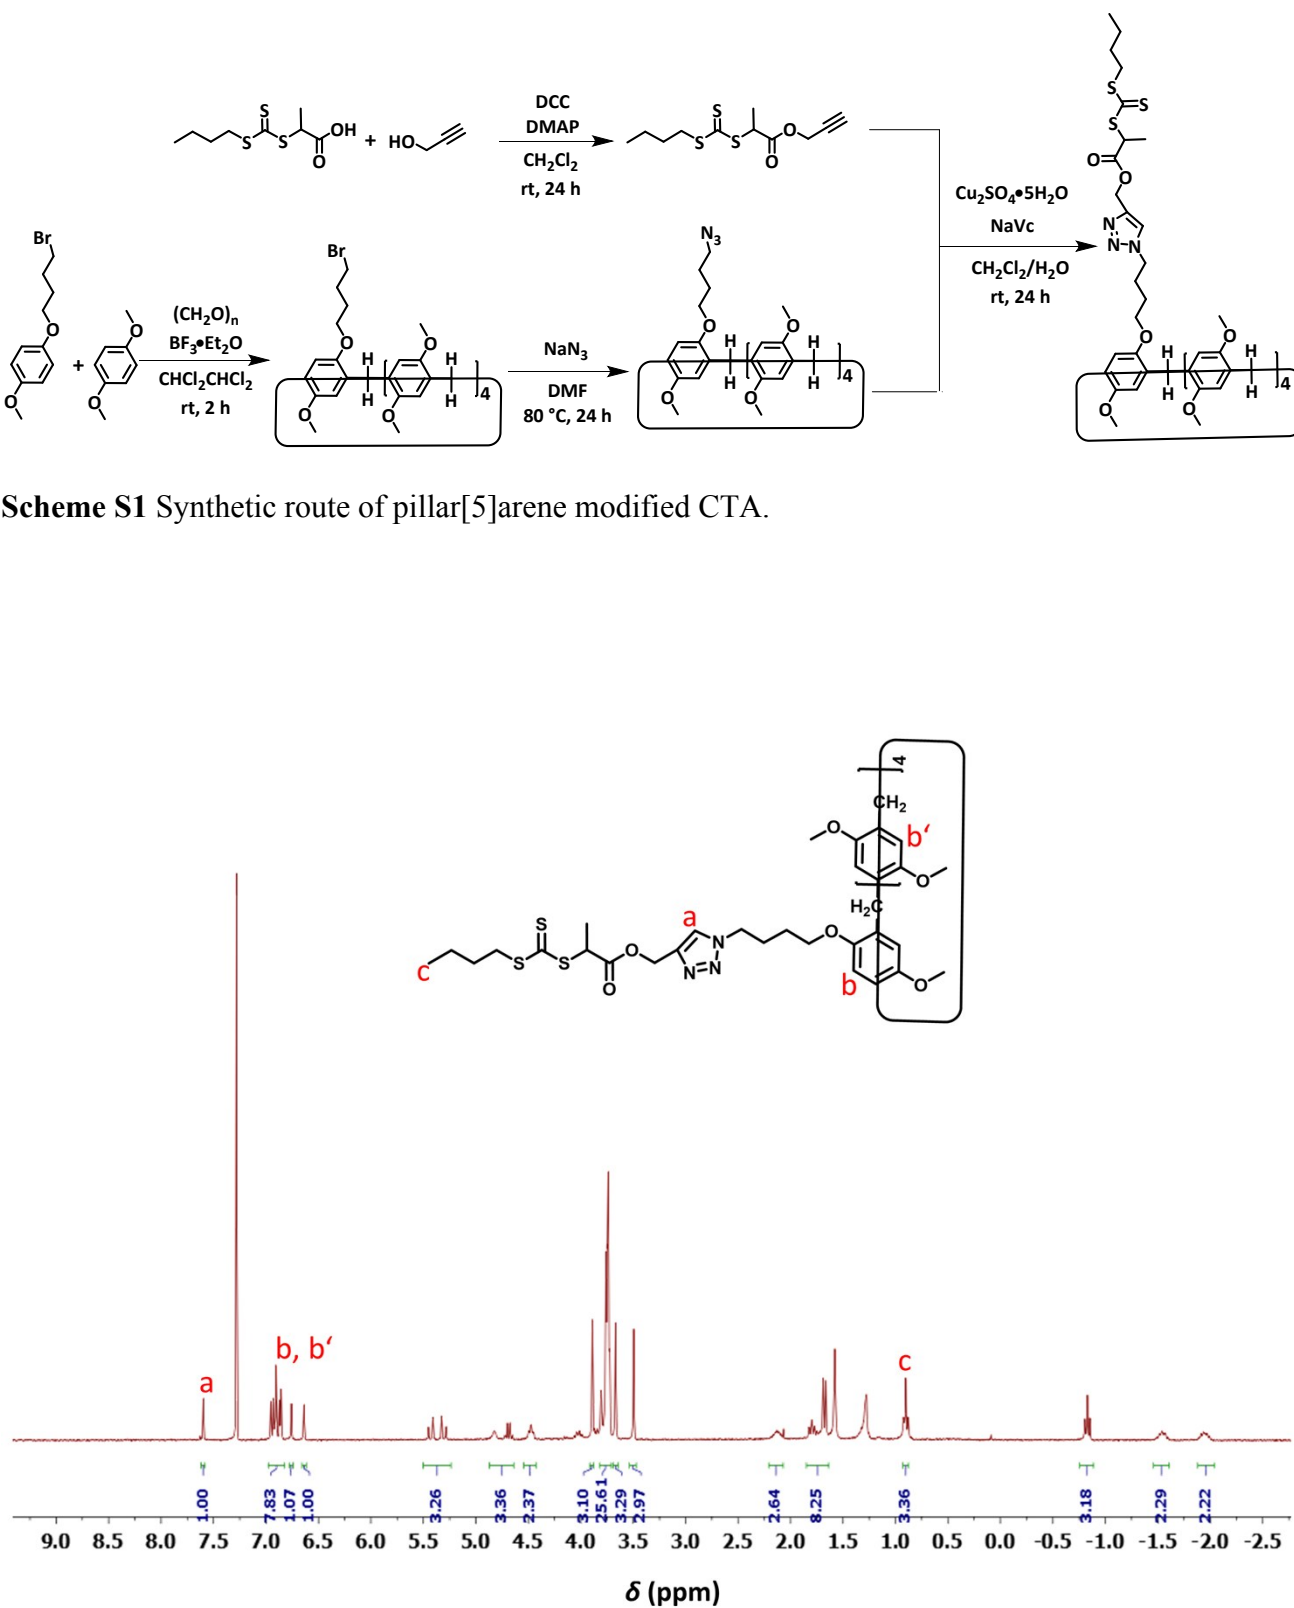

4

5 **Figure S1** <sup>1</sup>H NMR (CDCl<sub>3</sub>, 300 MHz) spectrum of the pillar[5]arene modified chain transfer agent  
6 (CTA).

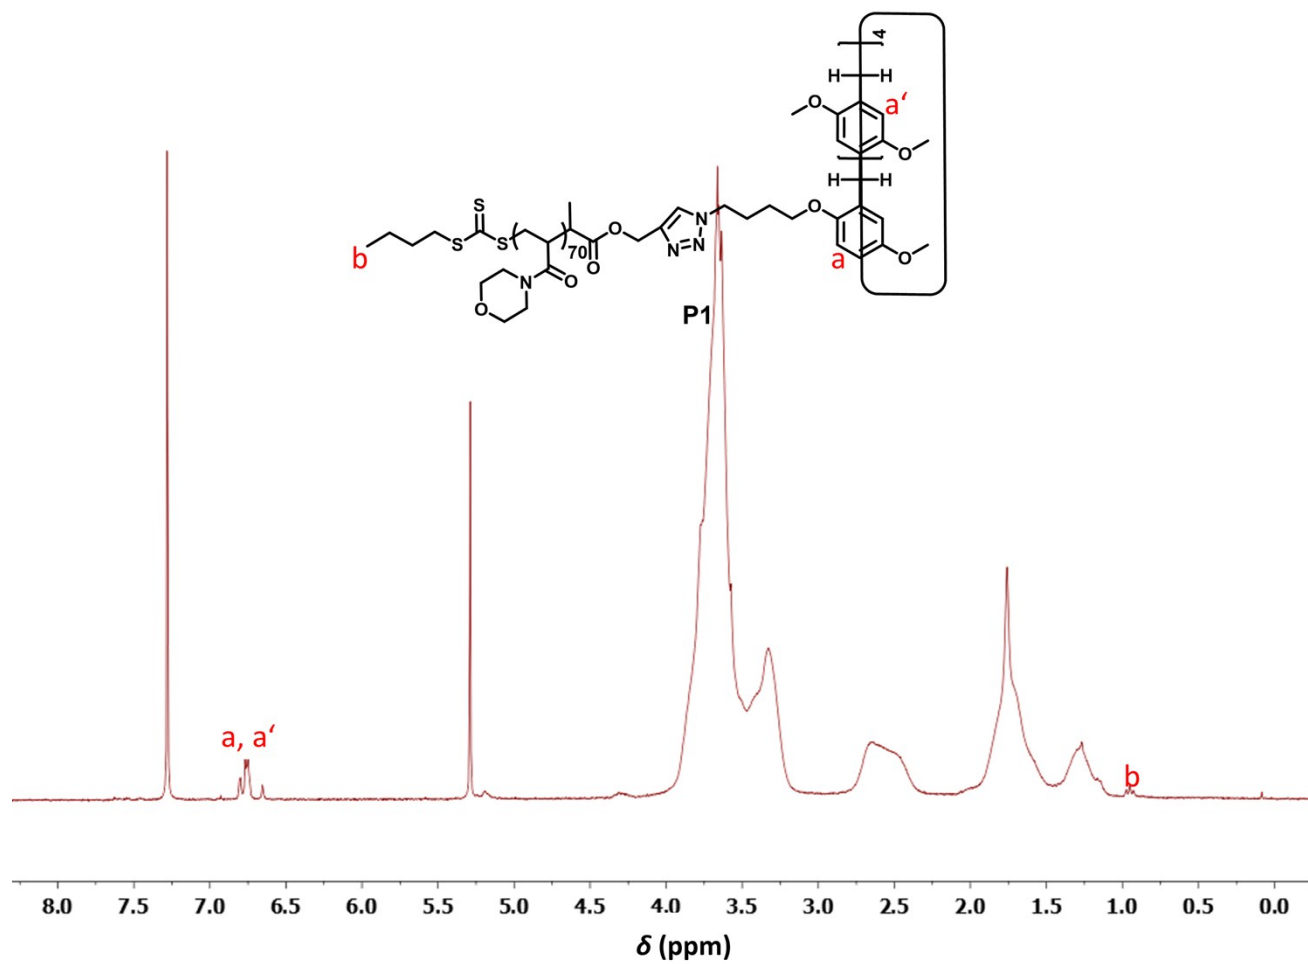

1

2 **Figure S2**  $^1\text{H}$  NMR ( $\text{CDCl}_3$ , 300 MHz) spectrum of **P1** (PNAM).

3

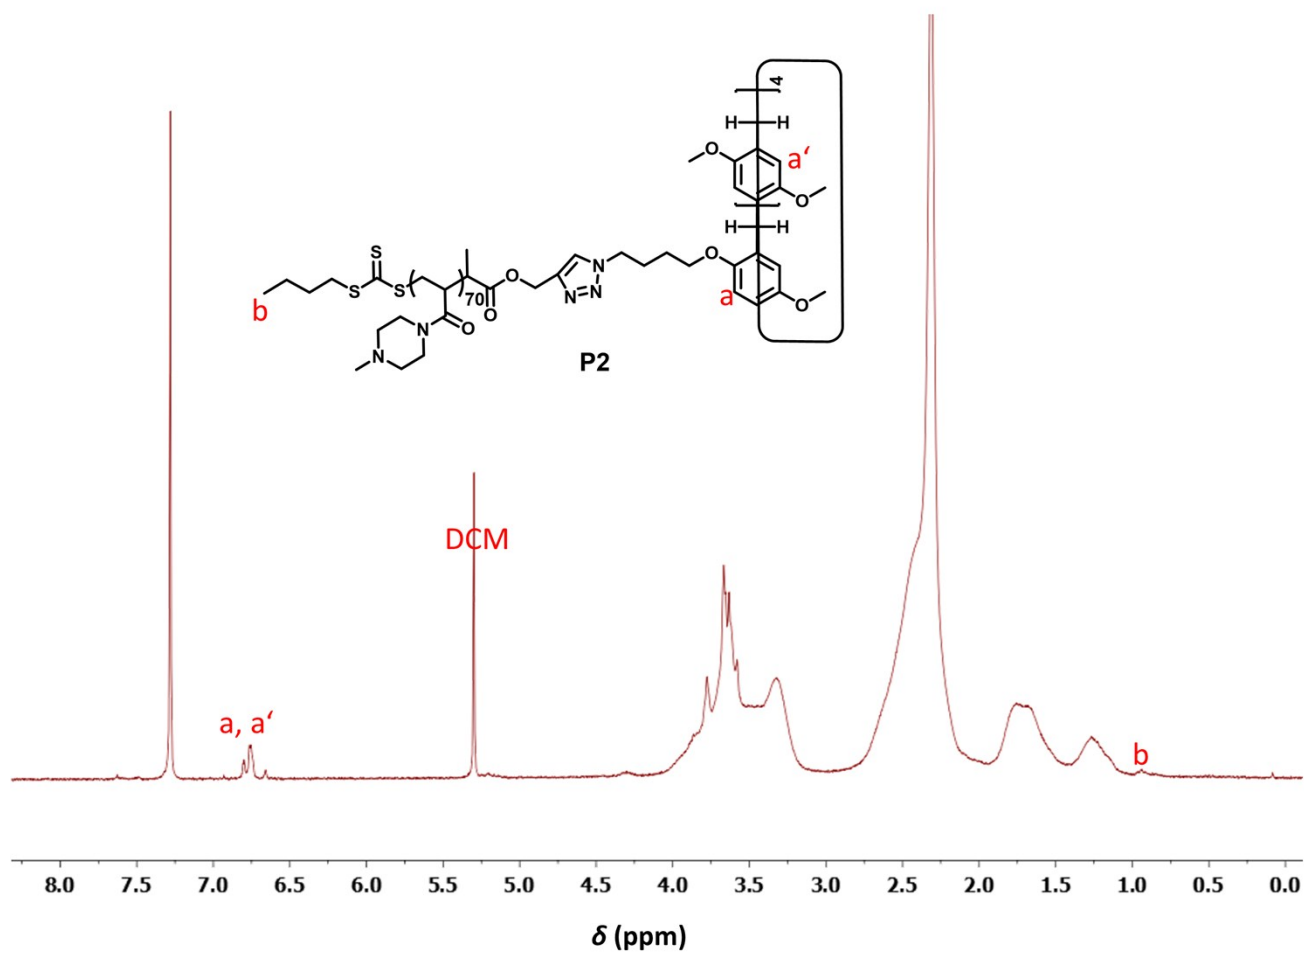

1

2 **Figure S3**  $^1\text{H}$  NMR ( $\text{CDCl}_3$ , 300 MHz) spectrum of **P2** (PNAMP).

3

4

5

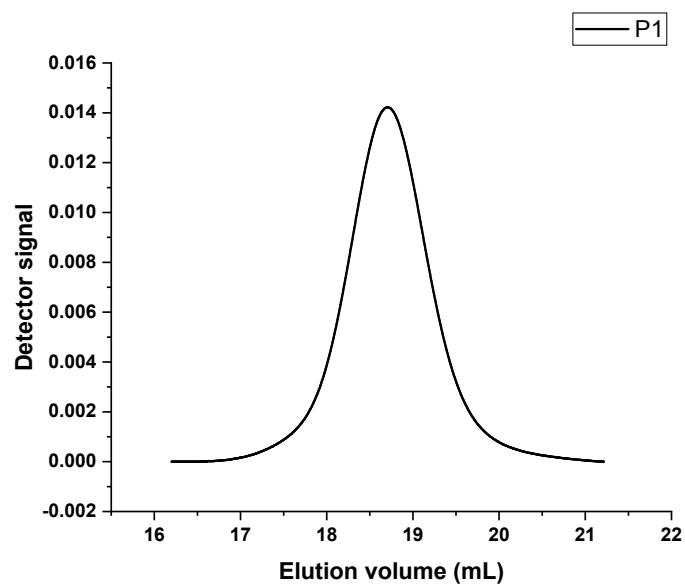

1

2 **Figure S4** SEC trace of **P1** (PNAM).

3

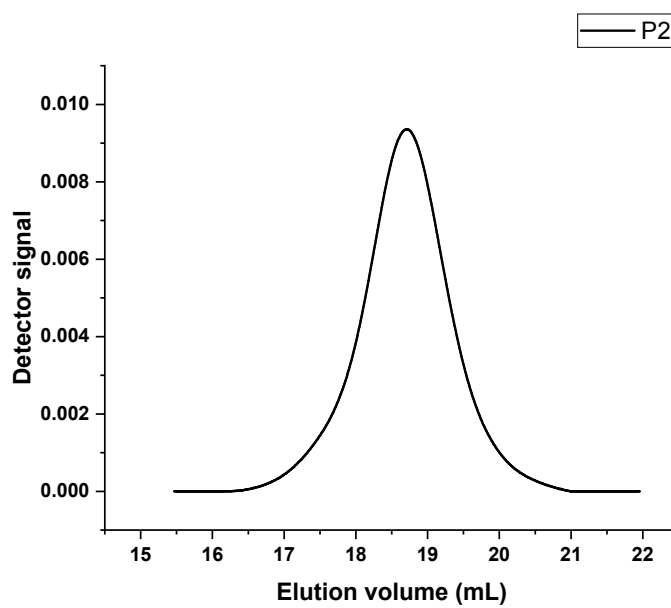

4

5 **Figure S5** SEC trace of **P2** (PNAMP).

6

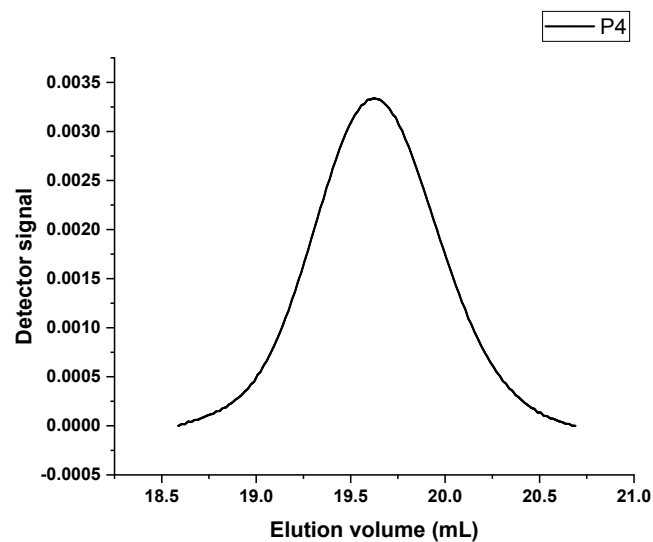

1

2 **Figure S6** SEC trace of **P4** (PCL).

3

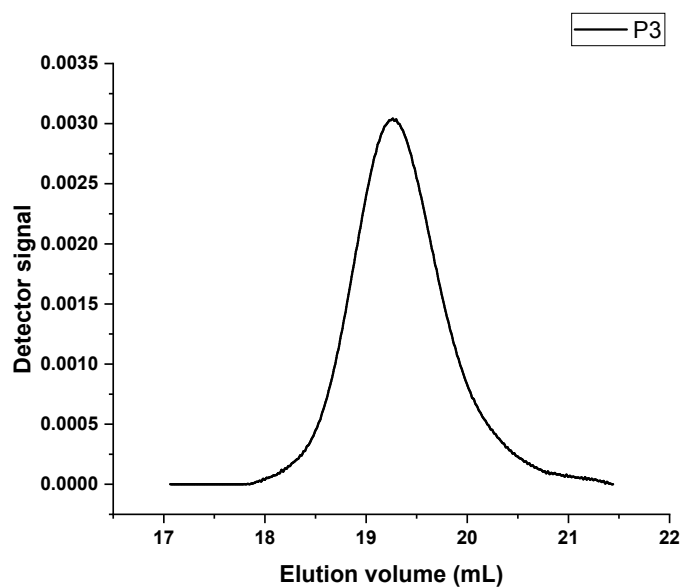

4

5 **Figure S7** SEC trace of **P3** (viologen-PCL).

6

7

8

9

10

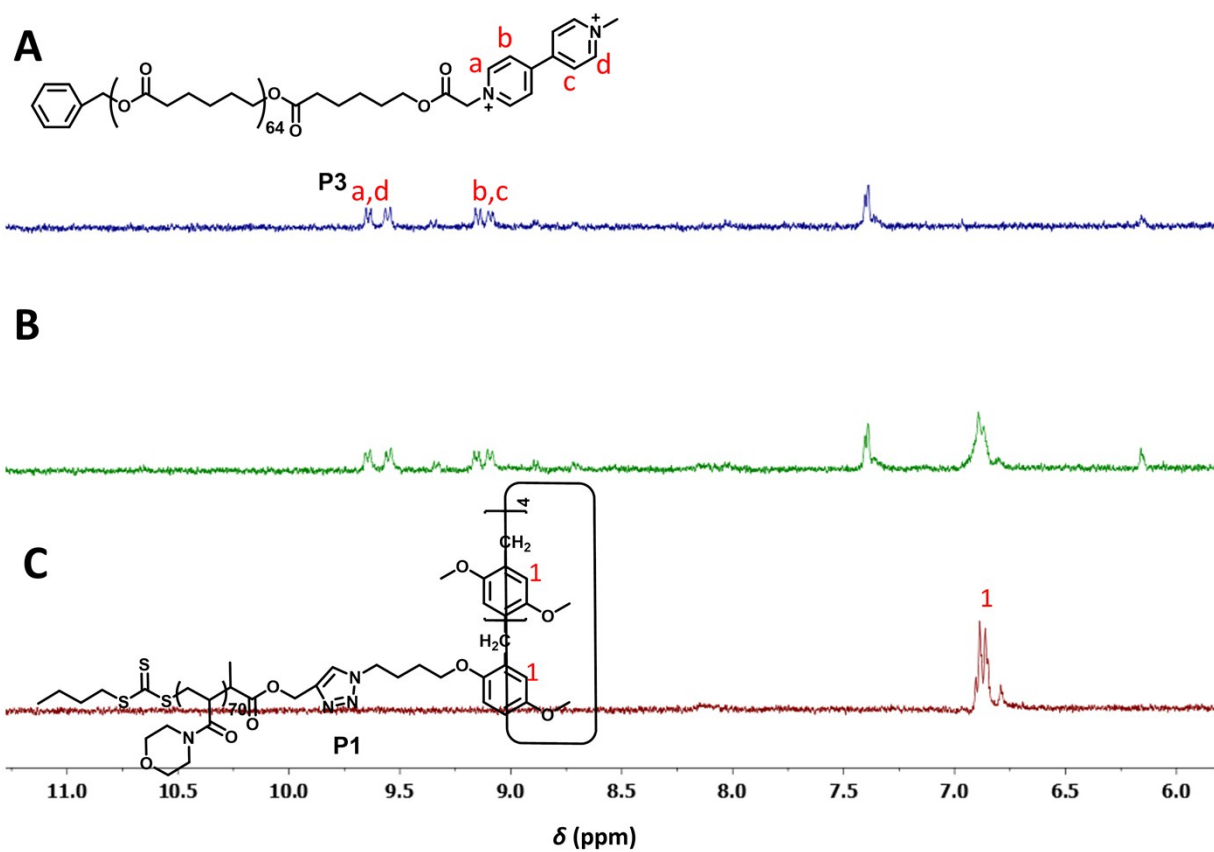

1  
2 **Figure S8**  $^1\text{H}$  NMR (acetone- $d_6$ , 300 MHz) spectra of A) 4 mM **P3** (viologen-PCL), B) 1/1 mixture  
3 of **P3** (viologen-PCL) and **P1** (PNAM), C) 4 mM **P1** (PNAM) measured at 25 °C.

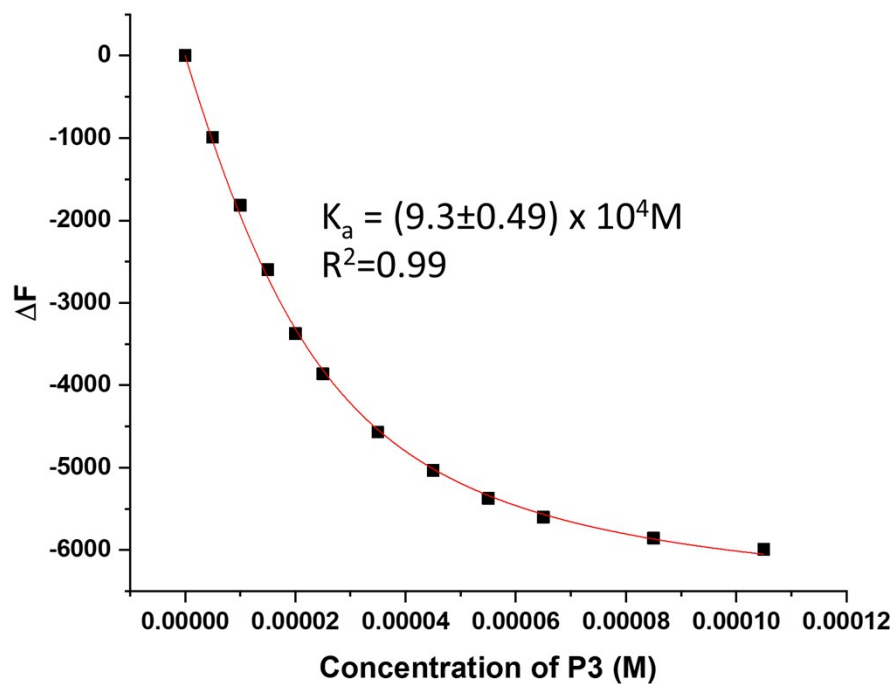

1

2 **Figure S9** Change of fluorescence intensity (**P2**) with increasing concentration of **P3**. The red line  
3 represents a corresponding exponential fit from which the association constant  $K_a$  can be calculated  
4 according to:  $\Delta F = (\Delta F_{\infty}/[H]_0)(0.5[G]_0 + 0.5([H]_0 + 1/K_a) - (0.5([G]_0^2 + (2[G]_0(1/K_a - [H]_0) +$   
5  $(1/K_a + [H]_0)^2)^{0.5}))$ .  $\Delta F$  is the difference in fluorescence intensity at 240 nm at  $[H]_0$  (**P2**),  $\Delta F_{\infty}$  is the  
6 difference in fluorescence intensity at 240 nm when **P2** is completely complexed.  $[H]_0$  is the fixed  
7 initial concentration of **P2** and  $[G]_0$  is the initial concentration of **P3**.

8

9

10



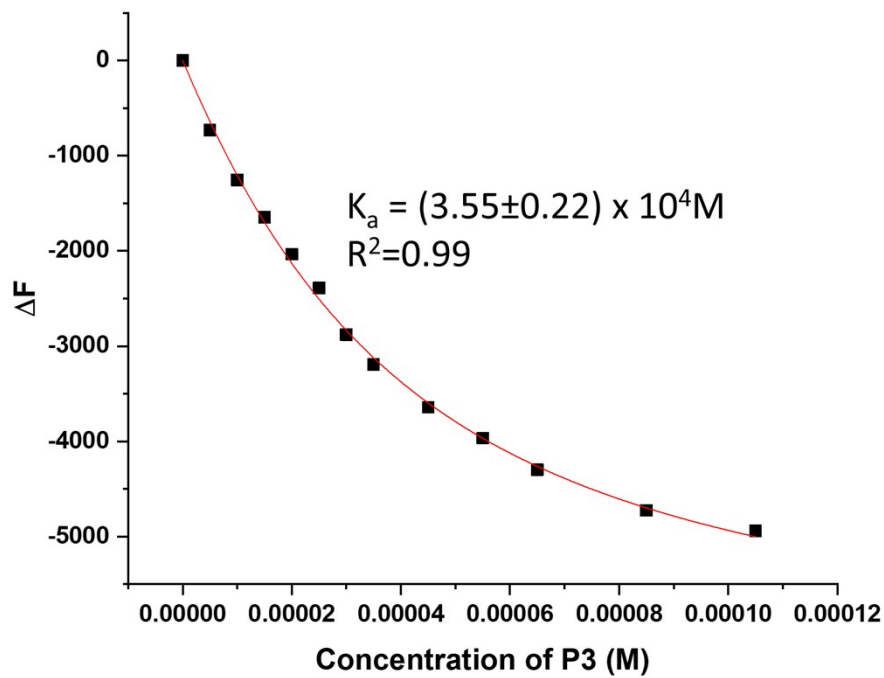

1

2 **Figure S10** Change of fluorescence intensity (**P1**) with increasing concentration of **P3**. The red line  
3 represents a corresponding exponential fit from which the association constant  $K_a$  can be calculated  
4 according to:  $\Delta F = (\Delta F_{\infty}/[H]_0)(0.5[G]_0 + 0.5([H]_0 + 1/K_a) - (0.5([G]_0^2 + (2[G]_0(1/K_a - [H]_0) +$   
5  $(1/K_a + [H]_0)^2)^{0.5}))$ .  $\Delta F$  is the difference in fluorescence intensity at 240 nm at  $[H]_0$  (**P1**),  $\Delta F_{\infty}$  is the  
6 difference in fluorescence intensity at 240 nm when **P1** is completely complexed.  $[H]_0$  is the fixed  
7 initial concentration of **P1** and  $[G]_0$  is the initial concentration of **P3**.

8

9

10

11

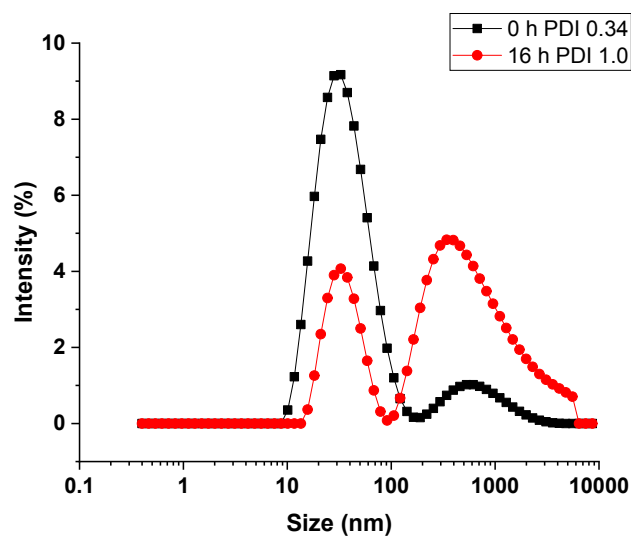

1  
2 **Figure S11** Size distribution (intensity weighted) of the particles formed by **P1+P3** after preparation  
3 (0 h) and after 16 h measured by DLS in PBS.

4  
5  
6  
7  
8

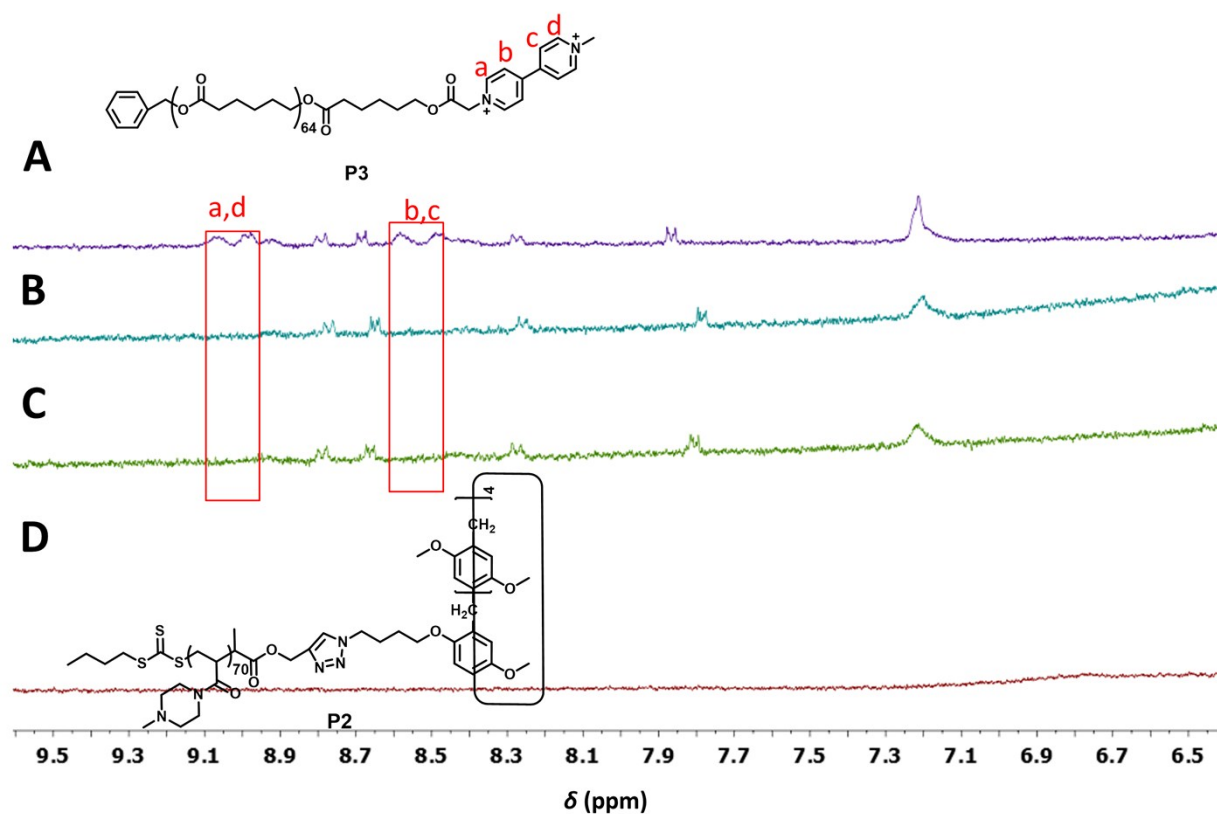

1  
2 **Figure S12**  $^1\text{H}$  NMR ( $\text{D}_2\text{O}$ , 300 MHz) spectra of A) 4 mM **P3** (viologen-PCL), B) 1/1 mixture of **P3**  
3 (viologen-PCL) and **P2** (PNAMP), C) 1/1 mixture of **P3** (viologen-PCL) and **P2** (PNAMP) in PBS,  
4 D) 4 mM **P2** (PNAMP) measured at 25 °C. The additionally visible signals belong to small  
5 impurities (< 5%, see also Figure S8) of free viologen salts, which are intensified due to their  
6 comparably good solubility and could not fully be removed by the purification steps.

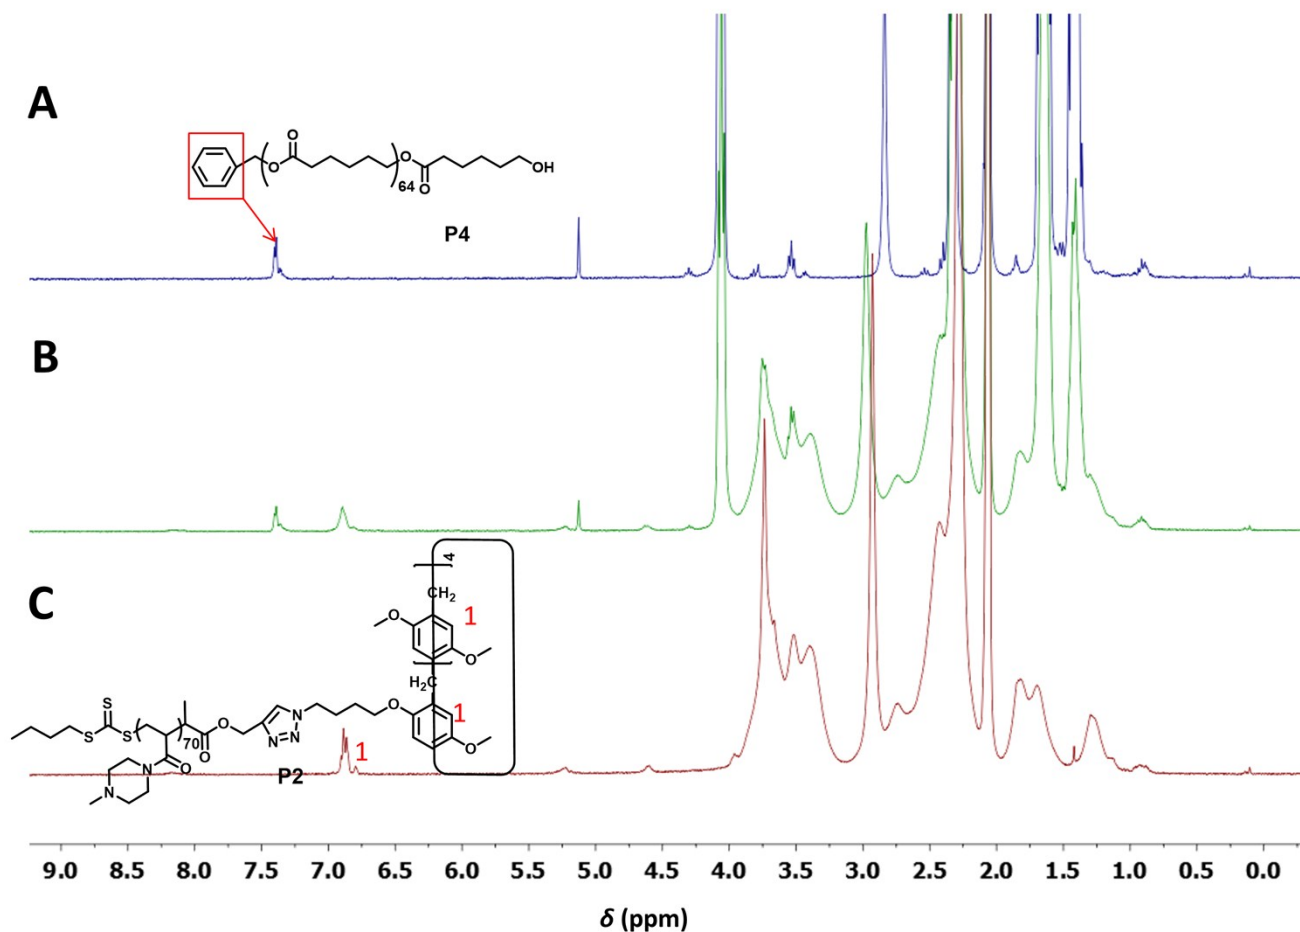

1  
 2 **Figure S13**  $^1\text{H}$  NMR (acetone- $d_6$ , 300 MHz) spectra of A) 4 mM **P4** (PCL), B) 1/1 mixture of **P4**  
 3 (PCL) and **P2** (PNAMP), C) 4 mM **P2** (PNAMP) measured at 25  $^\circ\text{C}$ .

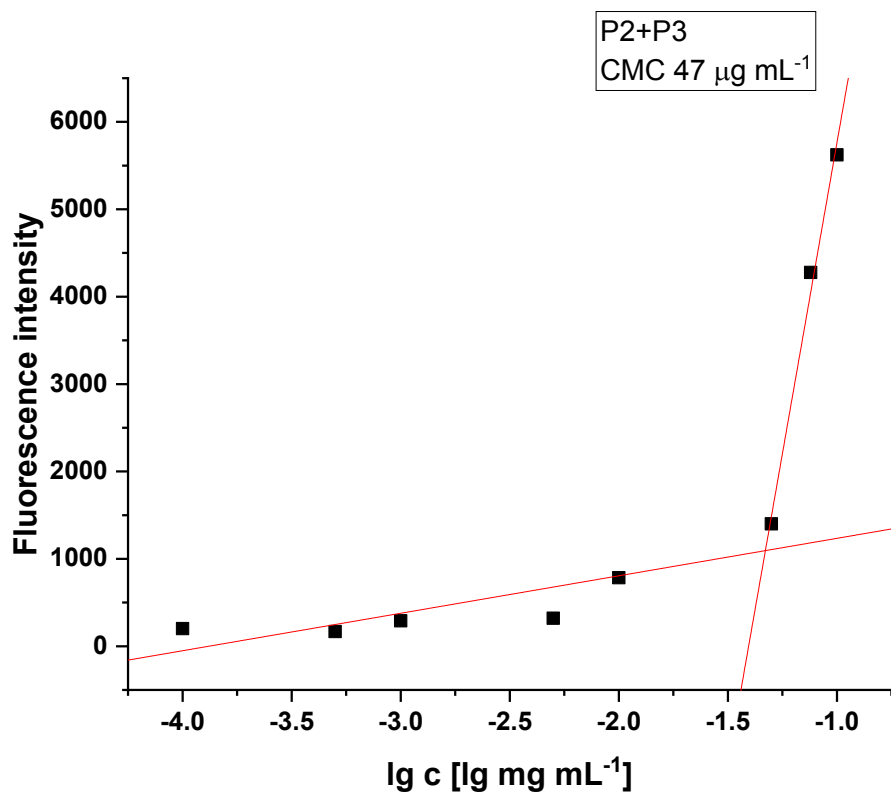

1  
2 **Figure S14** Fluorescence intensity of Nile Red at various concentrations of **P2+P3**. The CMC was  
3 determined as the intersection of the corresponding linear fits (red lines).  
4

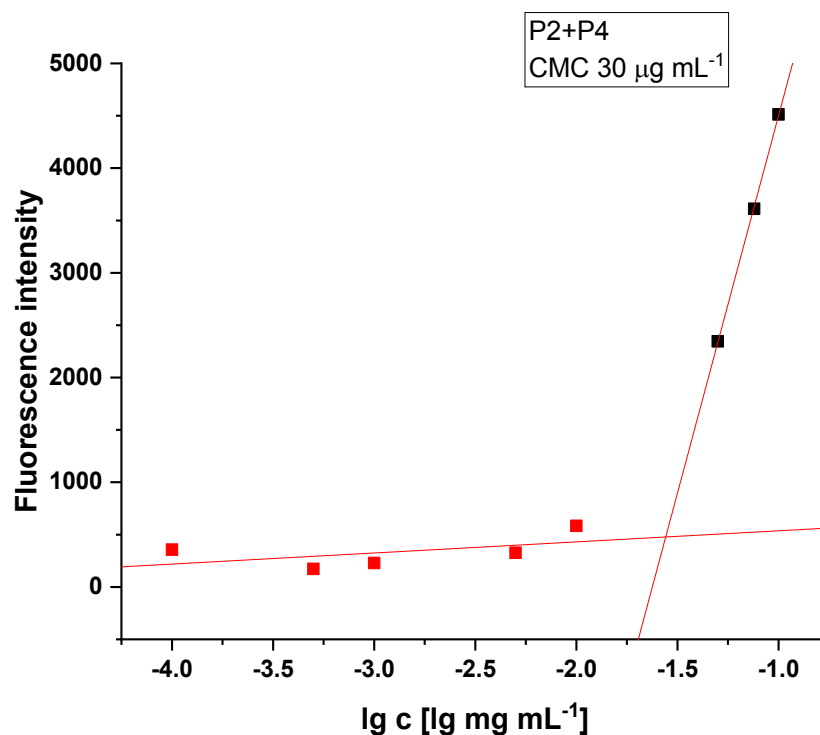

1  
2 **Figure S15** Fluorescence intensity of Nile Red at various concentrations of **P2+P4**. The CMC was  
3 determined as the intersection of the corresponding linear fits (red lines).

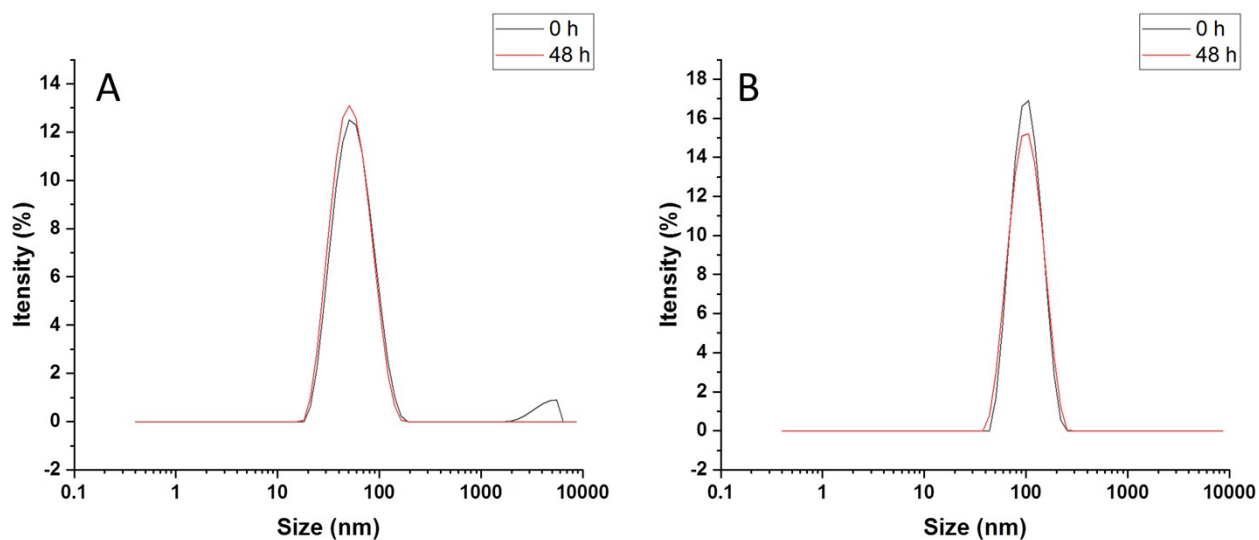

4  
5 **Figure S16** Size distribution (intensity weighted) of the particles formed by A) **P2+P3** and B) **P2+P4**  
6 in cell culture medium after 48 h.

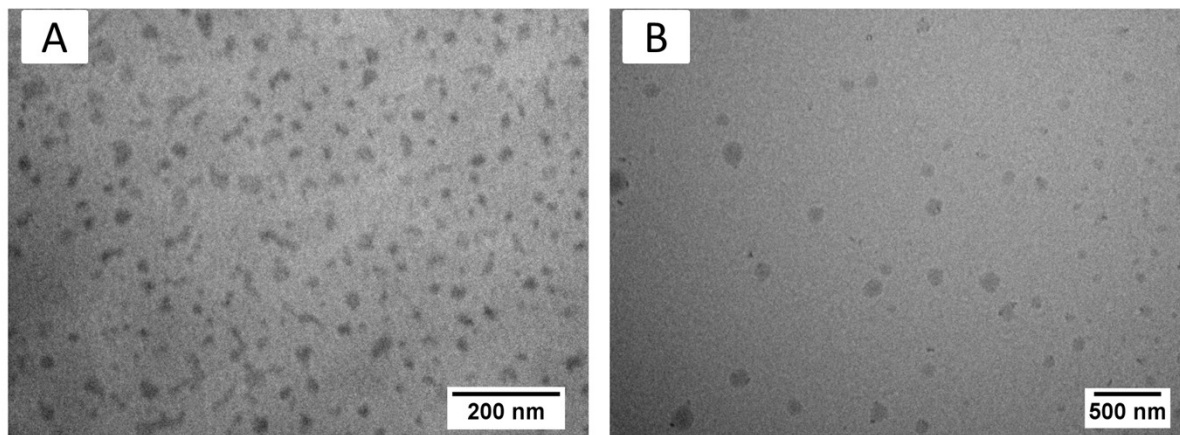

**Figure S17** TEM images of A) **P3** and B) **P4**.

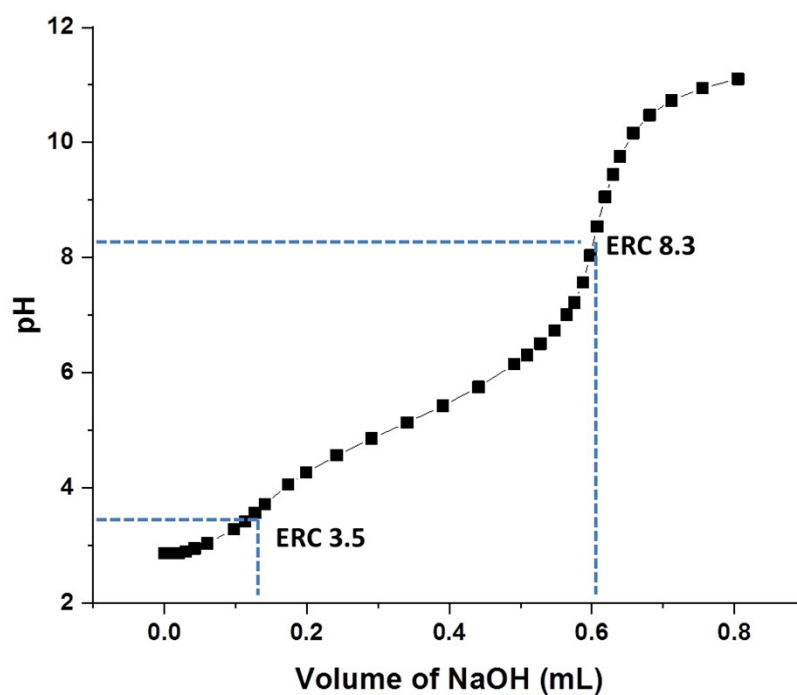

**Figure S18** Titration of **P2** ( $1 \text{ mg mL}^{-1}$ ) at  $25^\circ \text{C}$  with NaOH ( $0.1 \text{ M}$ ) after acidification with HCl ( $0.1 \text{ M}$ ). NaCl ( $0.1 \text{ M}$ ) was added to simulate physiological conditions.

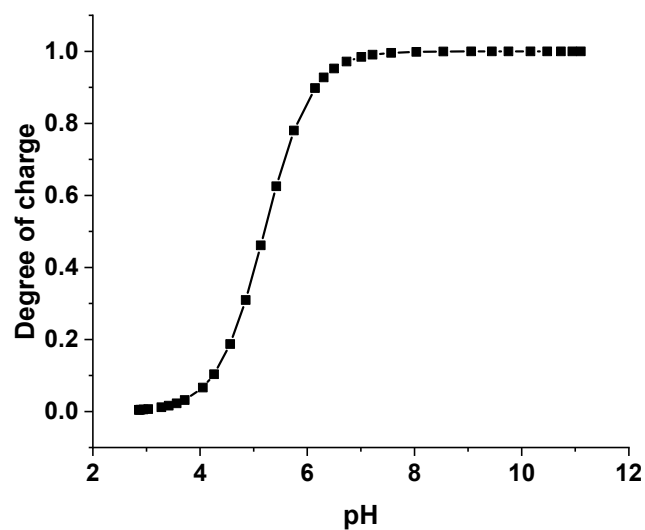

1  
2 **Figure S19** Degree of charge of PNAMP (**P2**) segments as a function of pH; the dashed line  
3 corresponds to the behavior of a dilute **P2** solution (intrinsic  $pK_a$  5.2).

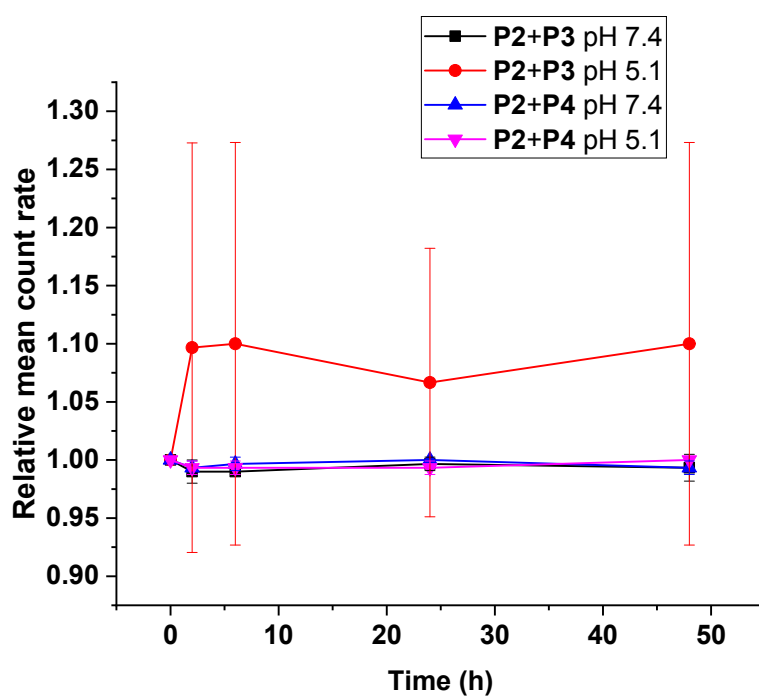

4  
5 **Figure S20:** Relative mean count rate of the respective dispersions at different pH at 37 °C  
6 determined by DLS.



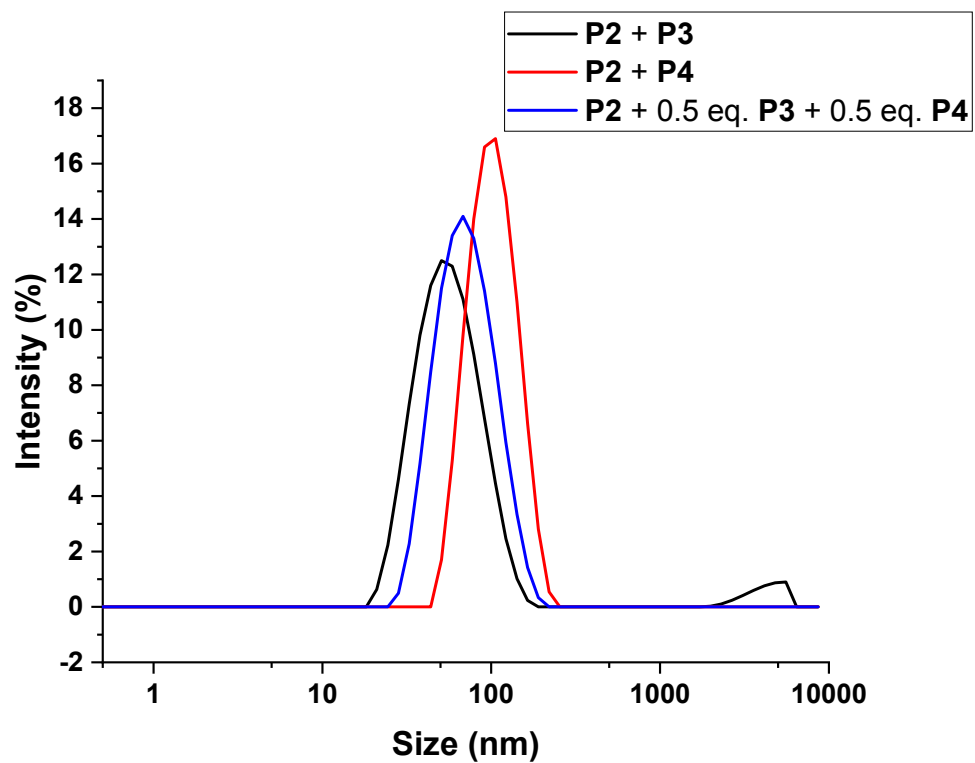

1

2 **Figure S21:** Size distributions (intensity weighted) of the respective nanoparticles measured by DLS.
